# Supplementary material for: MerTK Drives Proliferation and Metastatic Potential in Triple-Negative Breast Cancer
Source: MDPI journal article supplement (doi:10.3390/ijms25105109), 2024-05-08
Supplement: s1 [file s1]

**Supplemental Figure S1.** MerTK expression level in normal/benign human breast tissues. Magnification x20

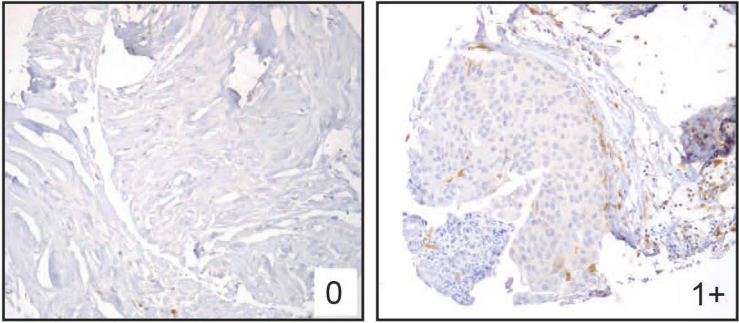

**Supplemental Figure S2.** The representative pictures of cell migration and invasion. Arrows indicated cells that invated through matrigel membranes.

**A. Migration**

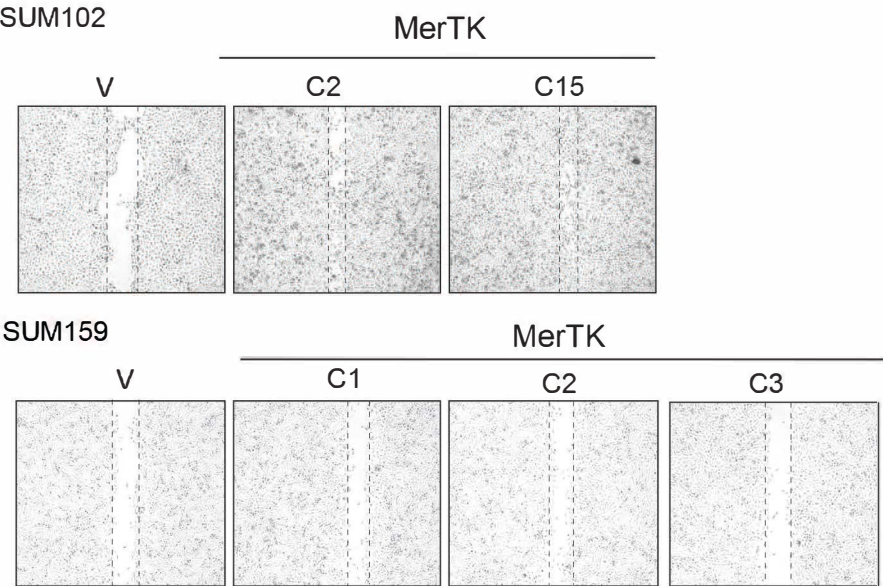

**B. Invasion**

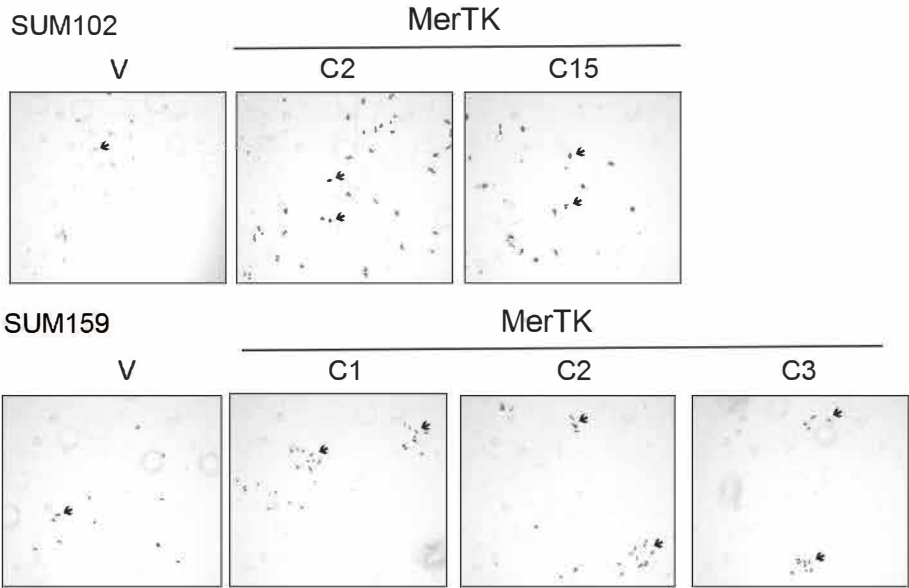

**Supplemental Figure S3.** Representative photographs of the lung with metastatic nodules are shown (arrow) in SUM159-MerTK clones

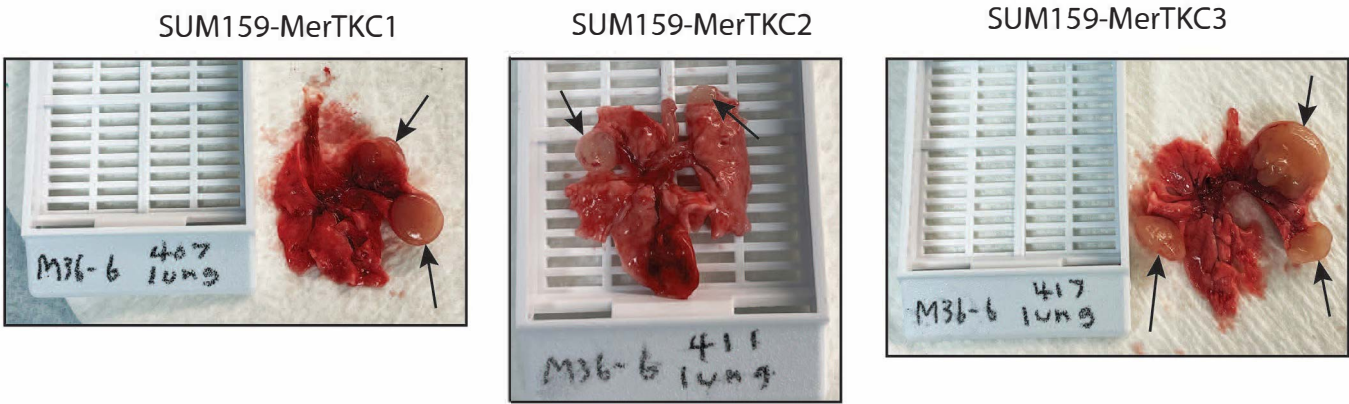

**Supplemental Figure S4.** Expression of ENG in lung metastatic nodules from SUM102-MerTK clones was analyzed by IHC. Magnification x40.

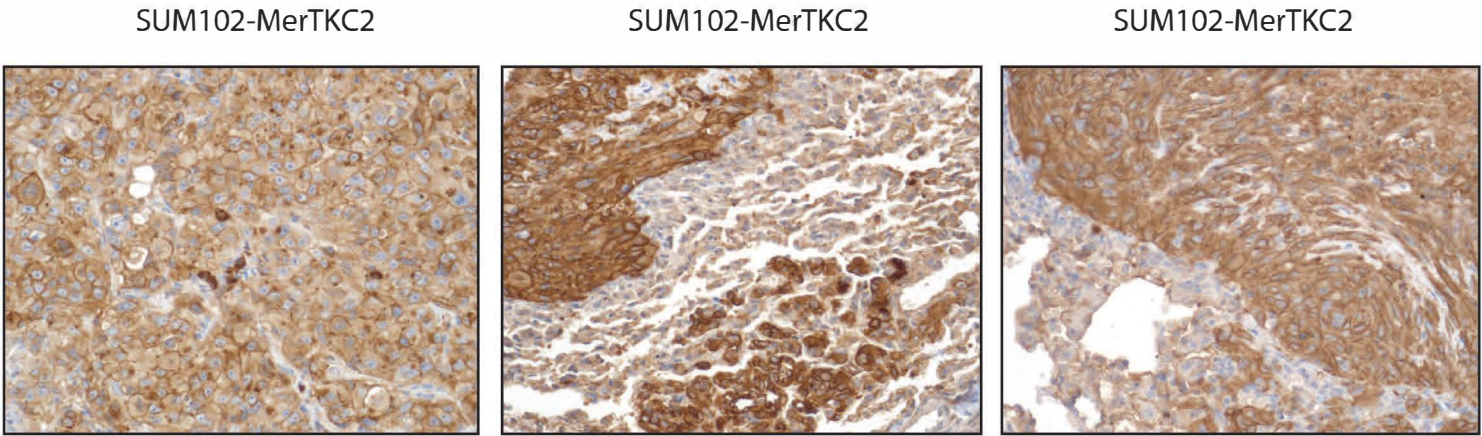

**Supplemental Figure S5.** Tumor weights in SUM102-V, SUM102-MerTKC2, and SUM102-MerTKC2-crENG8 cells. Tumor weight was measured at the tumor collection. ( $n=5-10$ ). \* $P < 0.05$ .

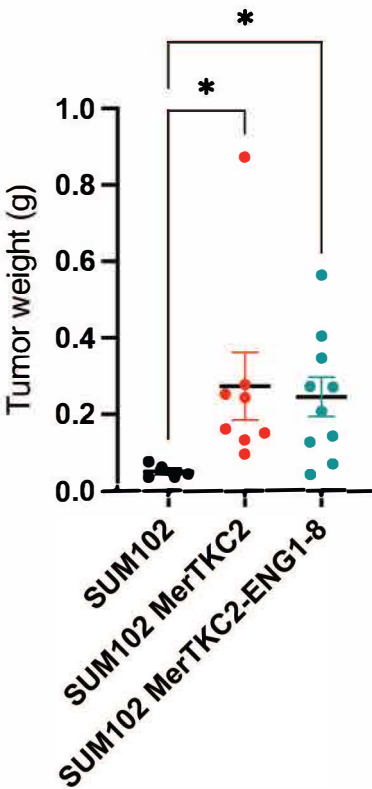

**Supplemental Figure S6.** Cell lysates from SUM102-MerTK and SUM159-MerTK clones, as well as from their corresponding vector control clones were analyzed by Western blotting with antibodies against MerTK, p-AKT (Ser 473), AKT, p-MAPK, MAPK, and Gapdh. Each Gapdh is shown as a loading control.

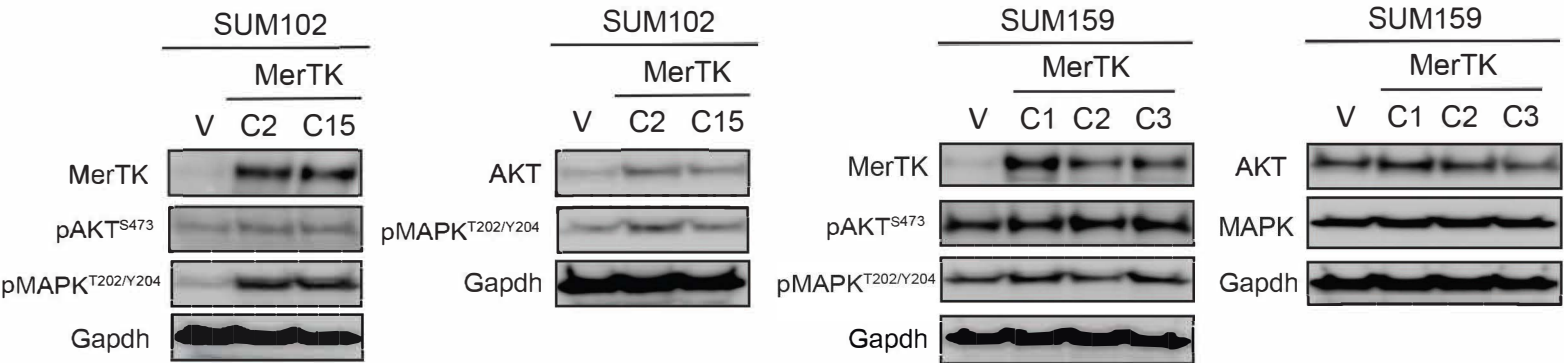

**Supplemental Figure S7.** Cell lysates from SUM102-MerTK and vector control clone were analyzed. The indicated proteins were detected by Immunoblot. Each Gapdh is shown as a loading control.

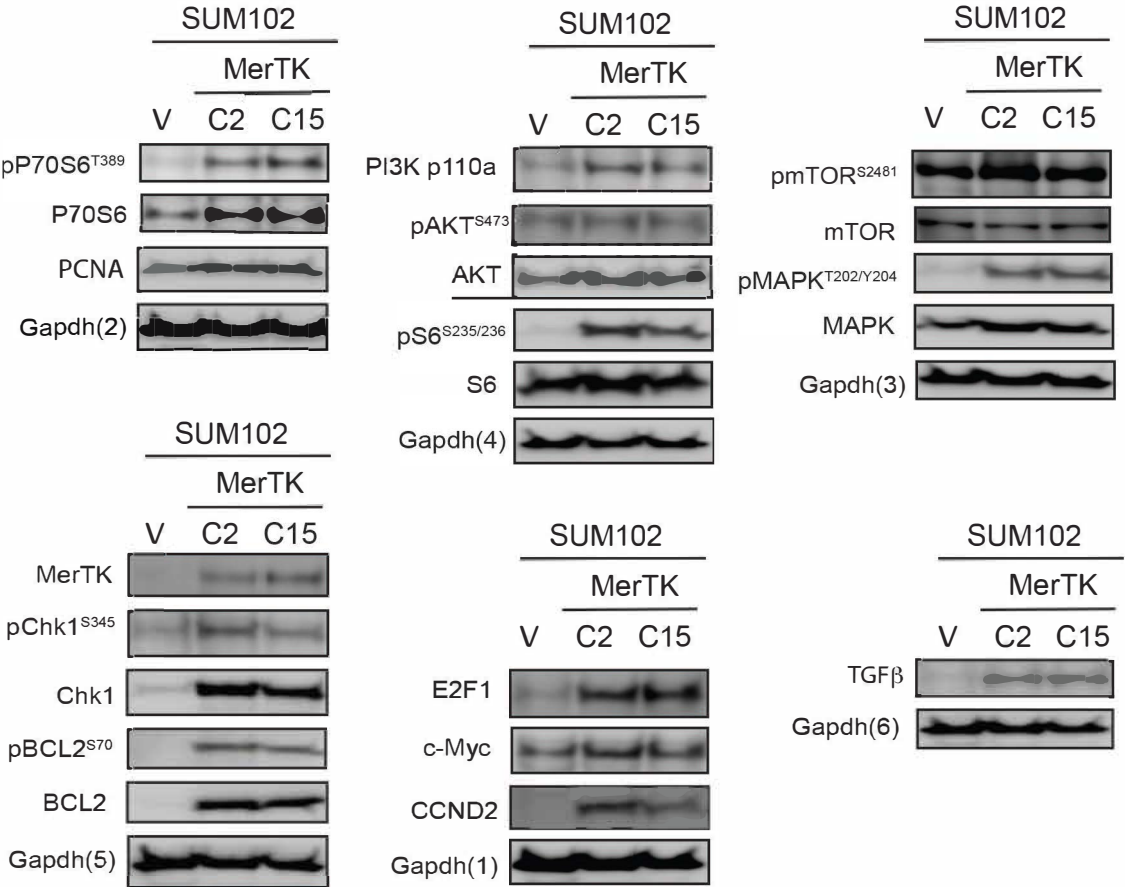

Supplemental Figure S8

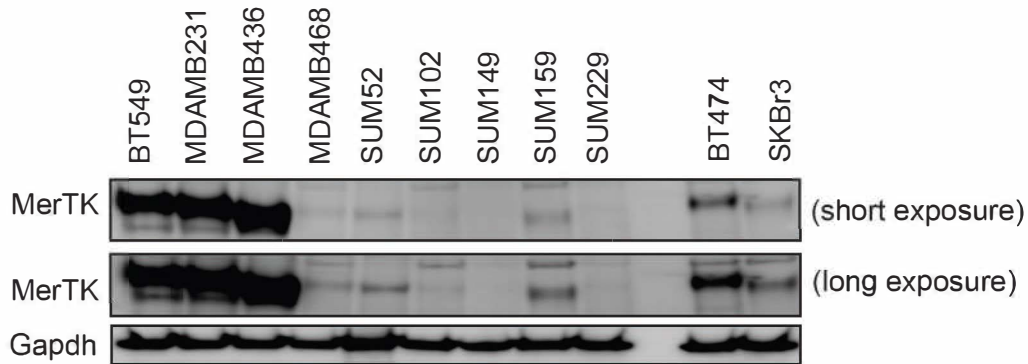



**Supplemental Table S1: Immunoblot, Flow cytometry and Immunohistochemistry (IHC) Antibodies**

| Antigen                       | Vendor                                        | Catalog Number, dilution |
|-------------------------------|-----------------------------------------------|--------------------------|
| Axl                           | Cell Signaling Technologies, Danvers, MA, USA | 8661, 1:1000             |
| MerTK (Immunoblot)            | Cell Signaling Technologies, Danvers, MA, USA | 4319, 1:1000             |
| MerTK (IHC)                   | Abcam, Cambridge, United Kingdom              | Ab52968, 1:50            |
| MerTK (Flow)                  | BioLegend, San Diego, CA, USA                 | 367612                   |
| Tyro3                         | Cell Signaling Technologies, Danvers, MA, USA | 5585, 1:1000             |
| GAPDH                         | Cell Signaling Technologies, Danvers, MA, USA | 2118, 1:3000             |
| Endoglin (Immunoblot)         | Cell Signaling Technologies, Danvers, MA, USA | 14606, 1:1000            |
| Endoglin (IHC)                | Abcam, Cambridge, United Kingdom              | Ab169545, 1:250          |
| Endoglin (Flow)               | BioLegend, San Diego, CA, USA                 | 800504                   |
| Akt                           | Cell Signaling Technologies, Danvers, MA, USA | 2920, 1:1000             |
| pAkt                          | Cell Signaling Technologies, Danvers, MA, USA | 4060, 1:1000             |
| PI3K p100 $\alpha$            | Cell Signaling Technologies, Danvers, MA, USA | 4255, 1:1000             |
| pmTOR S2481                   | Cell Signaling Technologies, Danvers, MA, USA | 2974, 1:1000             |
| mTOR                          | Cell Signaling Technologies, Danvers, MA, USA | 2972, 1:1000             |
| pP70S6 T389                   | Cell Signaling Technologies, Danvers, MA, USA | 9234, 1:1000             |
| P70S6                         | Cell Signaling Technologies, Danvers, MA, USA | 9202, 1:1000             |
| pS6 S235/236                  | Cell Signaling Technologies, Danvers, MA, USA | 4856, 1:1000             |
| S6                            | Cell Signaling Technologies, Danvers, MA, USA | 2317, 1:1000             |
| pBCL2 S70                     | Cell Signaling Technologies, Danvers, MA, USA | 2827, 1:1000             |
| BCL2                          | Cell Signaling Technologies, Danvers, MA, USA | 15071, 1:1000            |
| E2F1                          | Cell Signaling Technologies, Danvers, MA, USA | 3742, 1:1000             |
| pMAPK T202/Y204               | Cell Signaling Technologies, Danvers, MA, USA | 9101, 1:1000             |
| MAPK                          | Cell Signaling Technologies, Danvers, MA, USA | 9107, 1:1000             |
| Cyclin D2                     | Cell Signaling Technologies, Danvers, MA, USA | 3741, 1:1000             |
| TGF $\beta$                   | Cell Signaling Technologies, Danvers, MA, USA | 3709, 1:1000             |
| HER2                          | Cell Signaling Technologies, Danvers, MA, USA | 4290, 1:1000             |
| Live/Dead GhostRed 780 (Flow) | Tonbo Biosciences, San Diego, CA, USA         | 13-0865-T100             |
|                               |                                               |                          |

**Supplemental Table S2: TaqMan Probes**

| Gene           | Assay ID      |
|----------------|---------------|
| Human MerTK    | Hs01031979_m1 |
| Human Endoglin | HS00923996_m1 |
| Human ACTB     | 4332645       |
| Human 18S      | 4332641       |

**Supplemental Table S3: TNBC patient's clinical data**

| Subject | Stage | Histology category | ER (Clinical Data) | PR (Clinical Data) | HER2 (Clinical Data) | MerTK expression |
|---------|-------|--------------------|--------------------|--------------------|----------------------|------------------|
| TNBC 1  | IIB   | ductal             | NEG                | NEG                | NEG                  | 2+               |
| TNBC 2  | IIA   | ductal             | NEG                | NEG                | NEG                  | 1+               |
| TNBC 3  | IIA   | ductal             | NEG                | NEG                | NEG                  | 1+               |
| TNBC 4  | I     | mammary            | NEG                | NEG                | NEG                  | 1+               |
| TNBC 5  | IIA   | ductal             | NEG                | NEG                | NEG                  | 2+               |
| TNBC 6  | I     | ductal             | NEG                | NEG                | NEG                  | 2+               |
| TNBC 7  | IIA   | ductal             | NEG                | NEG                | NEG                  | 1+               |
| TNBC 8  | IIIC  | ductal             | NEG                | NEG                | NEG                  | 1+               |
| TNBC 9  | IIA   | ductal             | NEG                | NEG                | NEG                  | 2+               |
| TNBC 10 | IIA   | ductal             | NEG                | NEG                | NEG                  | 1+               |
| TNBC 11 | IIA   | ductal             | NEG                | NEG                | NEG                  | 0                |
| TNBC 12 | IIA   | ductal             | NEG                | NEG                | NEG                  | 1+               |
| TNBC 13 | II    | ductal subtype     | NEG                | NEG                | NEG                  | 0                |
| TNBC 14 | IIA   | ductal             | NEG                | NEG                | NEG                  | 1+               |
| TNBC 15 | IIB   | mammary            | NEG                | NEG                | NEG                  | 2+               |
| TNBC 16 | IIIA  | ductal             | NEG                | NEG                | NEG                  | 2+               |
| TNBC 17 | IIA   | ductal             | NEG                | NEG                | NEG                  | 1+               |
| TNBC 18 | IIB   | ductal             | NEG                | NEG                | NEG                  | 1+               |
| TNBC 19 | III   | ductal subtype     | NEG                | NEG                | NEG                  | 1+               |
| TNBC 20 | IIIA  | ductal             | NEG                | NEG                | NEG                  | 0                |
| TNBC 21 | IIIC  | ductal             | NEG                | NEG                | NEG                  | 0                |
| TNBC 22 | IIB   | ductal             | NEG                | NEG                | NEG                  | 0                |
| TNBC 23 | IIB   | ductal             | NEG                | NEG                | NEG                  | 2+               |
| TNBC 24 | IIB   | ductal             | NEG                | NEG                | NEG                  | 0                |
